# Supplementary material
Source: PubMed Central journal article supplement (PMC7387229)
Supplement: NIHMS1585938-supplement-1.pdf [file NIHMS1585938-supplement-1.pdf]

**Figure S1.** Forest plots of adjusted risk ratio (RR) of hospitalization comparing those participants with time-updated (A) opioid and (B) NSAID use in the past versus none, stratified by key demographic and case-mix subgroups and adjusted for all other covariates in primary analysis.

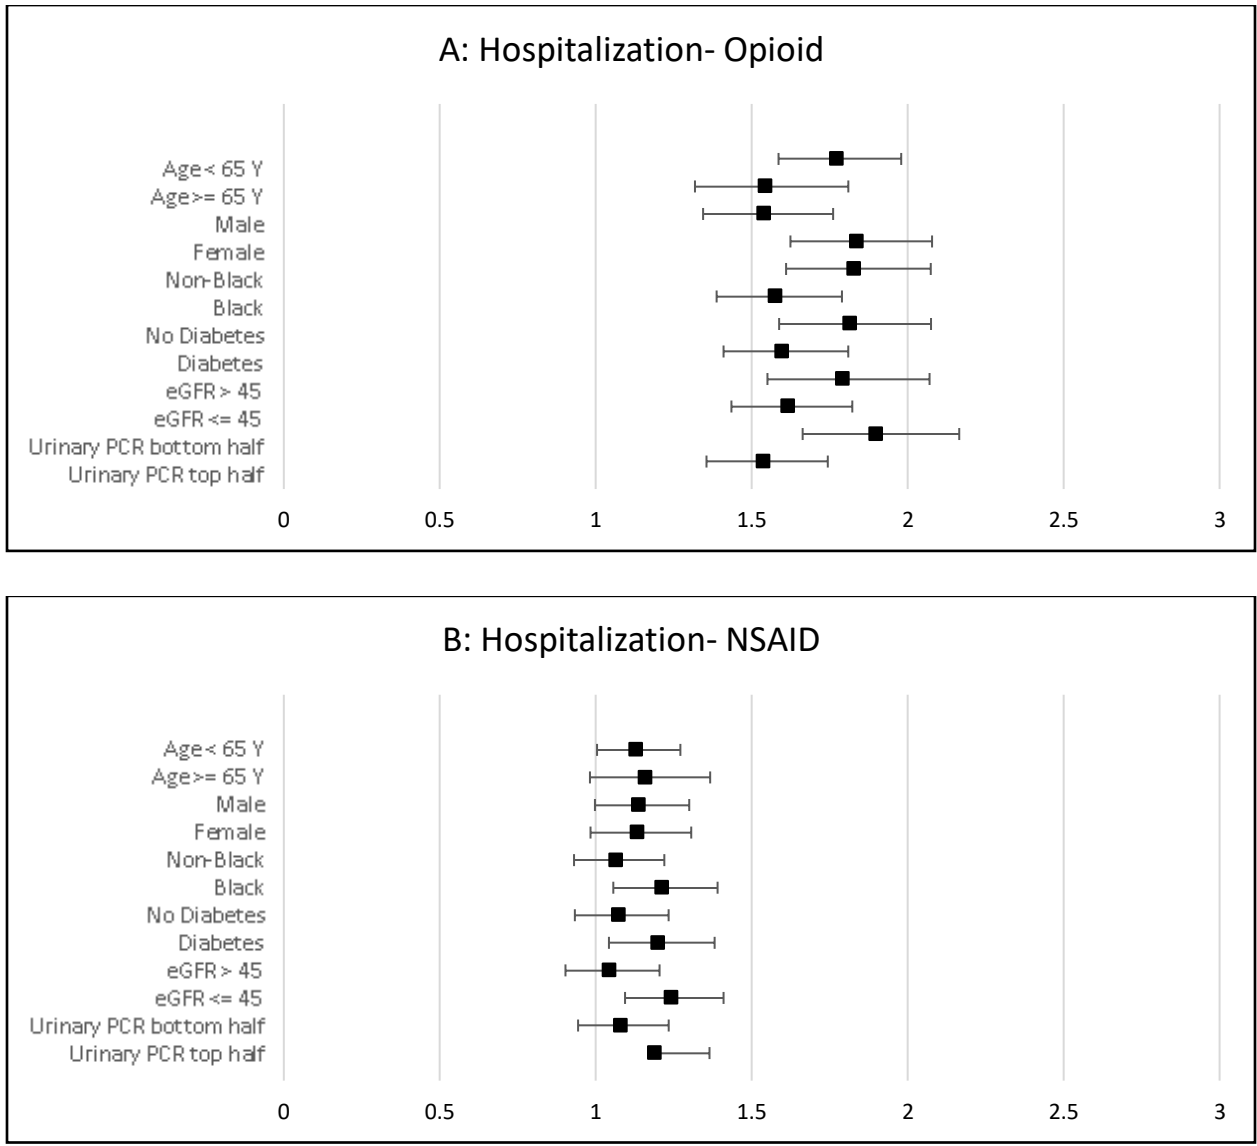

**Table S1 Forest plot point estimates and confidence intervals**

| 50% GFR Reduction or ESKD | NSAID        |        |        | OPIOD        |        |        |
|---------------------------|--------------|--------|--------|--------------|--------|--------|
|                           | Estimate     | Lower  | Upper  | Estimate     | Lower  | Upper  |
| Age < 65 Y                | 1.0376       | 0.8331 | 1.2922 | 1.1756       | 0.949  | 1.4562 |
| Age >= 65 Y               | 1.107        | 0.7831 | 1.5648 | 1.4613       | 1.0375 | 2.0582 |
| Male                      | 1.108        | 0.8546 | 1.4365 | 1.2715       | 0.9734 | 1.6608 |
| Female                    | 1.0061       | 0.7699 | 1.3148 | 1.2434       | 0.981  | 1.576  |
| Non-Black                 | 0.8337       | 0.6367 | 1.0915 | 1.1523       | 0.879  | 1.5106 |
| Black                     | 1.309        | 1.0119 | 1.6932 | 1.3486       | 1.0677 | 1.7033 |
| No Diabetes               | 0.8553       | 0.6283 | 1.1643 | 1.1679       | 0.8702 | 1.5675 |
| Diabetes                  | 1.206        | 0.9566 | 1.5205 | 1.2982       | 1.0367 | 1.6258 |
| eGFR > 45                 | 1.1717       | 0.8549 | 1.6057 | 1.1029       | 0.755  | 1.6111 |
| eGFR <= 45                | 0.9961       | 0.7963 | 1.2462 | 1.3255       | 1.0886 | 1.6139 |
| Urinary PCR bottom half   | 0.9075       | 0.6025 | 1.3669 | 1.3348       | 0.8545 | 2.085  |
| Urinary PCR top half      | 1.1028       | 0.8948 | 1.359  | 1.2378       | 1.02   | 1.502  |
| <b>ESKD</b>               | <b>NSAID</b> |        |        | <b>OPIOD</b> |        |        |
|                           | Estimate     | Lower  | Upper  | Estimate     | Lower  | Upper  |
| Age < 65 Y                | 0.8559       | 0.6567 | 1.1155 | 1.0348       | 0.8129 | 1.3173 |
| Age >= 65 Y               | 0.9954       | 0.6572 | 1.5077 | 1.3123       | 0.916  | 1.8801 |
| Male                      | 1.2097       | 0.9066 | 1.6141 | 1.0275       | 0.7692 | 1.3725 |
| Female                    | 0.6267       | 0.446  | 0.8804 | 1.2451       | 0.9459 | 1.639  |
| Non-Black                 | 0.7836       | 0.5642 | 1.0884 | 1.0386       | 0.7717 | 1.3978 |
| Black                     | 1.0178       | 0.7471 | 1.3866 | 1.188        | 0.9098 | 1.5511 |
| No Diabetes               | 0.8453       | 0.5807 | 1.2305 | 1.0281       | 0.7319 | 1.4444 |
| Diabetes                  | 0.9327       | 0.709  | 1.2269 | 1.1634       | 0.9072 | 1.492  |
| eGFR > 45                 | 1.3781       | 0.8859 | 2.1438 | 0.7902       | 0.457  | 1.3663 |
| eGFR <= 45                | 0.7727       | 0.5981 | 0.9983 | 1.2032       | 0.972  | 1.4893 |
| Urinary PCR bottom half   | 0.5203       | 0.2821 | 0.9598 | 1.4369       | 0.8459 | 2.4409 |
| Urinary PCR top half      | 1.0003       | 0.7859 | 1.2732 | 1.0675       | 0.8634 | 1.3199 |
| <b>DEATH</b>              | <b>NSAID</b> |        |        | <b>OPIOD</b> |        |        |
|                           | Estimate     | Lower  | Upper  | Estimate     | Lower  | Upper  |
| Age < 65 Y                | 0.8812       | 0.62   | 1.2525 | 1.6471       | 1.1739 | 2.311  |
| Age >= 65 Y               | 0.8073       | 0.5345 | 1.2193 | 1.3957       | 0.9519 | 2.0465 |
| Male                      | 0.7689       | 0.528  | 1.1197 | 1.3097       | 0.9122 | 1.8803 |
| Female                    | 0.9333       | 0.6207 | 1.4035 | 1.7721       | 1.2265 | 2.5603 |
| Non-Black                 | 0.9458       | 0.6658 | 1.3435 | 1.6926       | 1.2138 | 2.3603 |
| Black                     | 0.6732       | 0.4404 | 1.0291 | 1.2373       | 0.8378 | 1.8272 |
| No Diabetes               | 0.7082       | 0.469  | 1.0695 | 1.3287       | 0.8849 | 1.9951 |
| Diabetes                  | 0.9619       | 0.6696 | 1.3817 | 1.6436       | 1.1939 | 2.2627 |
| eGFR > 45                 | 0.771        | 0.5182 | 1.1471 | 1.5927       | 1.0604 | 2.3923 |
| eGFR <= 45                | 0.8949       | 0.617  | 1.2978 | 1.4576       | 1.0536 | 2.0165 |
| Urinary PCR bottom half   | 0.6664       | 0.4647 | 0.9557 | 1.4303       | 1.0008 | 2.0441 |
| Urinary PCR top half      | 1.0906       | 0.7292 | 1.6311 | 1.5715       | 1.0929 | 2.2597 |
| <b>HOSPITALIZATION</b>    | <b>NSAID</b> |        |        | <b>OPIOD</b> |        |        |
|                           | Estimate     | Lower  | Upper  | Estimate     | Lower  | Upper  |
| Age < 65 Y                | 1.1299       | 1.0042 | 1.2713 | 1.7717       | 1.586  | 1.9793 |
| Age >= 65 Y               | 1.1582       | 0.9814 | 1.3668 | 1.5445       | 1.3181 | 1.8098 |
| Male                      | 1.1386       | 0.9974 | 1.2997 | 1.5386       | 1.3442 | 1.761  |
| Female                    | 1.1332       | 0.9832 | 1.3061 | 1.8372       | 1.6242 | 2.0782 |
| Non-Black                 | 1.0654       | 0.9304 | 1.2199 | 1.8274       | 1.6102 | 2.074  |
| Black                     | 1.212        | 1.0563 | 1.3906 | 1.5756       | 1.3875 | 1.7893 |

|                         |        |        |        |        |        |        |
|-------------------------|--------|--------|--------|--------|--------|--------|
| No Diabetes             | 1.0728 | 0.933  | 1.2336 | 1.8151 | 1.5879 | 2.0749 |
| Diabetes                | 1.1998 | 1.0423 | 1.3811 | 1.5972 | 1.4097 | 1.8096 |
| eGFR > 45               | 1.0429 | 0.9029 | 1.2046 | 1.7916 | 1.5505 | 2.0702 |
| eGFR ≤ 45               | 1.2418 | 1.0939 | 1.4097 | 1.6172 | 1.435  | 1.8225 |
| Urinary PCR bottom half | 1.0789 | 0.9434 | 1.2339 | 1.8978 | 1.6633 | 2.1653 |
| Urinary PCR top half    | 1.1887 | 1.0353 | 1.3647 | 1.5372 | 1.355  | 1.7439 |

**Table S2 Hazard and rate ratios and corresponding E-values for each analgesic and associated outcomes**

| Outcome                 | Analgesic | Full cohort    |              | Analgesic | Sub-cohort     |              |
|-------------------------|-----------|----------------|--------------|-----------|----------------|--------------|
|                         |           | HR* (95% CI)   | E-value (CI) |           | c              | HR* (95% CI) |
| ESKD/50% eGFR Reduction | Opioid    | 1.4(1.2, 1.7)  | 2.2 (1.7)    | Opioid    | 1.6 (1.3, 2.0) | 2.6 (1.9)    |
|                         | NSAID     | 1.2 (1.0, 1.5) | 1.7 (1)      | NSAID     | 1.1 (0.9, 1.4) | 1.4 (1)      |
| ESKD                    | Opioid    | 1.4 (1.1, 1.7) | 2.2 (1.4)    | Opioid    | 1.5 (1.2, 2.0) | 2.4 (1.7)    |
|                         | NSAID     | 1.1 (0.8, 1.3) | 1.4 (1)      | NSAID     | 1.0 (0.7, 1.3) | 1 (1)        |
| Pre-ESKD Death          | Opioid    | 1.5 (1.2, 2.0) | 2.4 (1.7)    | Opioid    | 1.6 (1.1, 2.2) | 2.6 (1.4)    |
|                         | NSAID     | 0.9 (0.7, 1.1) | 1            | NSAID     | 1.2 (0.8, 1.7) | 1.7 (1)      |
| Hospitalization         | Opioid    | 1.7 (1.6, 1.9) | 2.8 (2.6)    | Opioid    | 1.7 (1.5, 1.9) | 2.8 (2.4)    |
|                         | NSAID     | 1.1 (1.0, 1.3) | 1.4 (1)      | NSAID     | 1.1 (0.9, 1.3) | 1.4 (1)      |

\*Note: Hazard ratio except for hospitalization which is a rate ratio

a) full cohort (number of visits =24552 for ESKD/halving of eGFR, 24838 for other outcomes) and b) a sub-cohort comprised of those cohort participants who ever used non-opioid analgesics or tramadol (number of visits =13663 for ESKD/halving of eGFR, 13859 for other outcomes)
